# Supplementary material
Source: Royal Society of Chemistry journal article supplement (doi:10.1039/d6nr01077f)
Supplement: d6nr01077f1.pdf [file d6nr01077f1.pdf]

## **Supporting Information**

# **Multiscale Porous Carbonate Apatite Honeycomb Granules Derived from a Metastable Calcium Carbonate Precursor for Enhanced Bone Formation**

Koichiro Hayashi,\* Ryo Kishida, and Kunio Ishikawa

Department of Biomaterials, Faculty of Dental Science, Kyushu University

3-1-1 Maidashi, Higashi-ku, Fukuoka 812-8582, Japan

Phone: +81-82-642-6345

E-mail: khayashi@dent.kyushu-u.ac.jp

\*Corresponding author

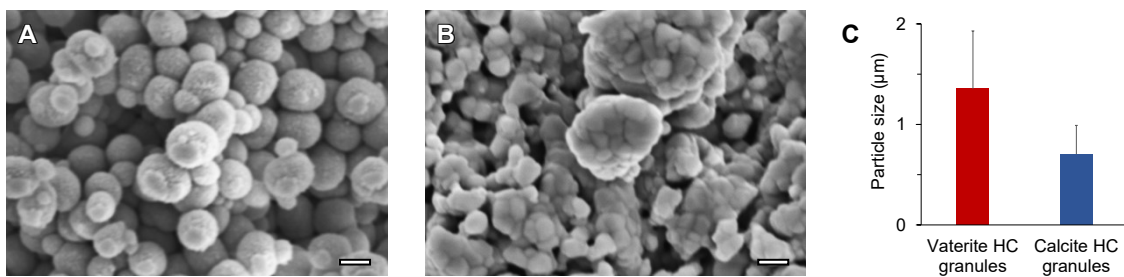

Figure S1. SEM images of (A) vaterite and (B) calcite honeycomb (HC) granules. Scale bars indicate 1  $\mu\text{m}$ . (C) Particle sizes of the vaterite and calcite granules. Data are shown as the mean  $\pm$  standard deviation.
